# Supplementary material for: Brain-Derived Neurotrophic Factor and Diabetes
Source: Int J Mol Sci. 2020 Jan 28;21(3):841. doi: 10.3390/ijms21030841 (PMC7037992; doi:10.3390/ijms21030841)
Supplement: Supplementary file 1 [file ijms-21-00841-s001.pdf]

**Table 1. Methods for increasing BDNF levels in mammals and their beneficial effects.**

| <b>1. Exogenous injection of BDNF</b> |                                      |                                                                                                                   |                             |                                                                                                                                                                                                                                                |
|---------------------------------------|--------------------------------------|-------------------------------------------------------------------------------------------------------------------|-----------------------------|------------------------------------------------------------------------------------------------------------------------------------------------------------------------------------------------------------------------------------------------|
| <b>Research</b>                       | <b>Material</b>                      | <b>Methods</b>                                                                                                    | <b>Effect on serum BDNF</b> | <b>Other effects</b>                                                                                                                                                                                                                           |
| Ono M et al [20]                      | mice                                 | Subcutaneous administration of BDNF                                                                               | No data                     | -decrease of elevated blood glucose level,                                                                                                                                                                                                     |
| Mitsugu et al. [23]                   | obese diabetic mice                  | subcutaneous administration of BDNF to obese diabetic mice                                                        | No data                     | -decrease glucose concentration,<br>-decrease concentration of pancreatic glucagon<br>- increase concentration of pancreatic insulin,<br>-increase beta cell producing insulin in pancreatic islet, -decrease non-producing insulin cells area |
| Kuroda et al. [24]                    | obese rats                           | administration of exogenous BDNF                                                                                  | No data                     | -improve glucokinase activity,<br>-decrease hepatic gluconeogenesis,<br>-improve insulin sensitivity,<br>-decrease level of fasting glucose and postprandial blood glucose<br>-decrease hyperinsulinemia                                       |
| Meek et al [25]                       | mice                                 | intracerebroventricular or or into the ventromedial hypothalamic nucleus injections of either BDNF or its vehicle | No data                     | - decrease hyperglycemia, -decrease blood glucose levels -suppress hepatic glucose production through inhibition of glucagone                                                                                                                  |
| Masaaki Seki et al.[38]               | streptozotocin-induced diabetic rats | intraocular administration of BDNF                                                                                | No data                     | -prevention dopaminergic amacrine cells from degeneration<br>-potential role in the treatment of early retinal neuropathy                                                                                                                      |
| Lei li et al. [40]                    | diabetic rats                        | continued intrathecal administration of BDNF                                                                      | No data                     | -alleviation of mechanical and thermal hyperalgesia<br>-reduce hyperexcitability of dorsal root ganglion neurons<br>-potential role in the treatment of painful diabetic neuropathy                                                            |

| 2. Dietary restrictions |                                                                  |                                                                                                                |                                                                                                                                                                                                                                                          |                                                                                                           |
|-------------------------|------------------------------------------------------------------|----------------------------------------------------------------------------------------------------------------|----------------------------------------------------------------------------------------------------------------------------------------------------------------------------------------------------------------------------------------------------------|-----------------------------------------------------------------------------------------------------------|
| Research                | Material                                                         | Methods                                                                                                        | Effect on BDNF                                                                                                                                                                                                                                           | Other effects                                                                                             |
| Duan et al. [22]        | Mice                                                             | dietetary restrictions                                                                                         | increase BDNF production in brain cells                                                                                                                                                                                                                  | decrease concentration of glucose, insulin, and leptin in mice whose level of these factors was increased |
| 3. Physical activity    |                                                                  |                                                                                                                |                                                                                                                                                                                                                                                          |                                                                                                           |
| Research                | Material                                                         | Methods                                                                                                        | Effect on BDNF                                                                                                                                                                                                                                           | Other effects                                                                                             |
| Babaei et al. [11]      | well-trained individuals and people living a sedentary lifestyle | Comparison of well-trained individuals and people living a sedentary lifestyle aerobic and anaerobic exercises | -basic BDNF concentration in serum is significantly lower in the well-trained group than in the control group<br>-In both groups aerobic and anaerobic exercises increased BDNF level about its initial value                                            | Well-trained people had better results in a picture recall memory test.                                   |
| Lee et al. [29]         | adolescents with type 2 diabetes mellitus                        | 12 weeks aerobic exercise                                                                                      | -adolescents with type 2 diabetes mellitus and control group had similar resting BDNF levels.<br>-after the 12 weeks aerobic exercise,, there was no significant increase in the resting BDNF levels in the patients with type 2 diabetes mellitus group |                                                                                                           |
| Tonoli et al. [31]      | patients with type 1 diabetes                                    | high-intensity exercise                                                                                        | -serum BDNF levels were significantly higher in people with type 1 diabetes compared with the control healthy group.<br>-in both groups BDNF increased after exercise.                                                                                   |                                                                                                           |
| Cancela JM et al. [43]  | patients with dementia                                           | riding a bicycle for minimum 15 minutes instead of taking part in recreational activities                      |                                                                                                                                                                                                                                                          | -improved memory<br>-improved mobility                                                                    |

|                           |                                     |                                                                                                                                                        |                                                                                                                                                                                                         |                                                                  |
|---------------------------|-------------------------------------|--------------------------------------------------------------------------------------------------------------------------------------------------------|---------------------------------------------------------------------------------------------------------------------------------------------------------------------------------------------------------|------------------------------------------------------------------|
| Rasoul Eslami et al. [44] | rats                                | endurance training                                                                                                                                     | -diabetes reduce the expression of BDNF in the sensory and motor roots.<br>-this phenomenon can be reversed through endurance training.                                                                 |                                                                  |
| Tang et al. [45]          | rats                                | weight-bearing ladder and aerobic treadmill exercise                                                                                                   | upregulate expression of BDNF and CREB in hippocampus                                                                                                                                                   | - learning ability increased                                     |
| Floel et al. [46]         | healthy patients                    | comparison of patients according to physical activity, measured with physical activity questionnaire, parameters of aerobic exercises, or both factors | -physically active patients had higher concentration of neurotrophin – a Granulocyte-Colony Stimulating Factor (G-CSF)<br>-physical activity level was not significantly correlated with the BDNF level | - Physically active patients showed increased grey matter volume |
| Hyun-chul Cho et al. [47] | healthy patients                    | treadmill VO2max performance                                                                                                                           | -increase in BDNF concentration in serum, plasma and platelets immediately after exercises                                                                                                              |                                                                  |
| Tonoli et al. [48]        | patients with type 1 diabetes       | two different intensities of exercises (high-intensity and continuous medium-intensity)                                                                | -BDNF levels increased significantly after both exercise intensities. The BDNF increase had a dose-response effect for exercise intensity                                                               |                                                                  |
| Brinkmann et al. [49]     | elderly people with type 2 diabetes | examine the level of neurotrophic factors before and after exercise                                                                                    | -depending on the exercise mode, acute submaximal exercise can increase levels of neurotrophic factors (BDNF, VEGF)                                                                                     |                                                                  |
